# Supplementary material for: Persistence, Isolation and Diversification of a Naturally Fragmented Species in Local Refugia: The Case of Hydromantes strinatii
Source: PLoS One. 2015 Jun 24;10(6):e0131298. doi: 10.1371/journal.pone.0131298 (PMC4479377; doi:10.1371/journal.pone.0131298)
Supplement: S3 Table — Pairwise fixation index (Fst) values based on allozyme data. * p <0.05; ** p < 0.01; *** p < 0.001;—not significant (PDF) [file pone.0131298.s005.pdf]

| Pairwise F <sub>st</sub> values. Pairwise fixation index (F <sub>st</sub> ) values based on allozyme data. * p <0.05; ** p < 0.01; *** p < 0.001; --- not significant |           |           |            |            |            |           |            |            |           |            |           |           |           |           |           |           |           |           |           |           |           |           |           |           |           |           |           |           |
|-----------------------------------------------------------------------------------------------------------------------------------------------------------------------|-----------|-----------|------------|------------|------------|-----------|------------|------------|-----------|------------|-----------|-----------|-----------|-----------|-----------|-----------|-----------|-----------|-----------|-----------|-----------|-----------|-----------|-----------|-----------|-----------|-----------|-----------|
| Pop                                                                                                                                                                   | 1-SBR     | 2-SBC     | 3-SSM      | 4-SCG      | 5-SCA      | 6-STS     | 7-SCR      | 8-SBN      | 9-SCO     | 10-SBD     | 11-SAL    | 12-SRA    | 14-SBA    | 13-SIS    | 15-SOR    | 16-SRI    | 17-STA    | 18-SGA    | 19-STO    | 20-SSL    | 21-STR    | 23-SSG    | 24-STC    | 25-STE    | 26-STN    | 27-SLU    | 28-SPE    | 29-SMB    |
| 2                                                                                                                                                                     | 0.2793**  |           |            |            |            |           |            |            |           |            |           |           |           |           |           |           |           |           |           |           |           |           |           |           |           |           |           |           |
| 3                                                                                                                                                                     | 0.0536--- | 0.0751--- |            |            |            |           |            |            |           |            |           |           |           |           |           |           |           |           |           |           |           |           |           |           |           |           |           |           |
| 4                                                                                                                                                                     | 0.3447*   | 0.2704*   | 0.2425*    |            |            |           |            |            |           |            |           |           |           |           |           |           |           |           |           |           |           |           |           |           |           |           |           |           |
| 5                                                                                                                                                                     | 0.0074--- | 0.2835**  | 0.0507---  | 0.4417***  |            |           |            |            |           |            |           |           |           |           |           |           |           |           |           |           |           |           |           |           |           |           |           |           |
| 6                                                                                                                                                                     | 0.2586*** | 0.3164*** | 0.1905**   | -0.0733--- | 0.3330***  |           |            |            |           |            |           |           |           |           |           |           |           |           |           |           |           |           |           |           |           |           |           |           |
| 7                                                                                                                                                                     | 0.0342--- | 0.1177--- | -0.0278--- | 0.1979---  | 0.1299---  | 0.1842*** |            |            |           |            |           |           |           |           |           |           |           |           |           |           |           |           |           |           |           |           |           |           |
| 8                                                                                                                                                                     | 0.1027--- | 0.1313--- | 0.0030---  | 0.3184**   | 0.0377---  | 0.2894*** | 0.0862---  |            |           |            |           |           |           |           |           |           |           |           |           |           |           |           |           |           |           |           |           |           |
| 9                                                                                                                                                                     | 0.0639--- | 0.1388--- | -0.0012--- | 0.2032*    | 0.1626---  | 0.2137*** | -0.0853--- | 0.1283*    |           |            |           |           |           |           |           |           |           |           |           |           |           |           |           |           |           |           |           |           |
| 10                                                                                                                                                                    | 0.0229--- | 0.2054*   | 0.0109---  | 0.4402**   | -0.0281--- | 0.3252**  | 0.1212---  | -0.0051--- | 0.1459--- |            |           |           |           |           |           |           |           |           |           |           |           |           |           |           |           |           |           |           |
| 11                                                                                                                                                                    | 0.0957--- | 0.0643--- | -0.0619--- | 0.2014---  | 0.0510---  | 0.1657*   | -0.0179--- | -0.0160--- | 0.0223--- | -0.0185--- |           |           |           |           |           |           |           |           |           |           |           |           |           |           |           |           |           |           |
| 12                                                                                                                                                                    | 0.2017*** | 0.2920*** | 0.1950**   | 0.1333---  | 0.2788***  | 0.1518**  | 0.1450**   | 0.2507***  | 0.1776*** | 0.2339**   | 0.2343*** |           |           |           |           |           |           |           |           |           |           |           |           |           |           |           |           |           |
| 13                                                                                                                                                                    | 0.6071*** | 0.5692*** | 0.5654***  | 0.3764**   | 0.6729***  | 0.4336*** | 0.5743***  | 0.5964***  | 0.5738*** | 0.6983***  | 0.2508*** | 0.5475*** |           |           |           |           |           |           |           |           |           |           |           |           |           |           |           |           |
| 14                                                                                                                                                                    | 0.5803*** | 0.5301*** | 0.5383***  | 0.4206***  | 0.6446***  | 0.4969*** | 0.4987***  | 0.5729***  | 0.5193*** | 0.6136***  | 0.2417*** | 0.0836*** | 0.5679*** |           |           |           |           |           |           |           |           |           |           |           |           |           |           |           |
| 15                                                                                                                                                                    | 0.7619*** | 0.6256*** | 0.6957***  | 0.7157***  | 0.7643***  | 0.7227*** | 0.6831***  | 0.6989***  | 0.6962*** | 0.7266***  | 0.6537*** | 0.7685*** | 0.7188*** | 0.744***1 |           |           |           |           |           |           |           |           |           |           |           |           |           |           |
| 16                                                                                                                                                                    | 0.8206*** | 0.6332*** | 0.7100***  | 0.7178***  | 0.7745***  | 0.8063*** | 0.7064***  | 0.7360***  | 0.7583*** | 0.7062***  | 0.7332*** | 0.7638*** | 0.7358*** | 0.8152*** | 0.2698--- |           |           |           |           |           |           |           |           |           |           |           |           |           |
| 17                                                                                                                                                                    | 0.8120*** | 0.7171*** | 0.7558***  | 0.7874***  | 0.7954***  | 0.7966*** | 0.7320***  | 0.7756***  | 0.7624*** | 0.7827***  | 0.7688*** | 0.8098*** | 0.7661*** | 0.8099*** | 0.2485**  | 0.1735**  |           |           |           |           |           |           |           |           |           |           |           |           |
| 18                                                                                                                                                                    | 0.8256*** | 0.6805*** | 0.7678***  | 0.7720***  | 0.8094***  | 0.8010*** | 0.7345***  | 0.7489***  | 0.7648*** | 0.7609***  | 0.7399*** | 0.8250*** | 0.7803*** | 0.8067*** | 0.2600--- | 0.1446--- | 0.0034--- |           |           |           |           |           |           |           |           |           |           |           |
| 19                                                                                                                                                                    | 0.4289*** | 0.2707*** | 0.2870***  | 0.2526***  | 0.4340***  | 0.3812*** | 0.2511***  | 0.4141***  | 0.2900*** | 0.3867***  | 0.3606*** | 0.4701*** | 0.2644*** | 0.4648*** | 0.5047*** | 0.4236*** | 0.5490*** | 0.5431*** |           |           |           |           |           |           |           |           |           |           |
| 20                                                                                                                                                                    | 0.5137*** | 0.3037*** | 0.3687***  | 0.3985***  | 0.4847***  | 0.5440*** | 0.3934***  | 0.4339***  | 0.4517*** | 0.4165***  | 0.5128*** | 0.5457*** | 0.3968*** | 0.6477*** | 0.5883*** | 0.5328*** | 0.6267*** | 0.6167*** | 0.1757*** |           |           |           |           |           |           |           |           |           |
| 21                                                                                                                                                                    | 0.5963*** | 0.3892*** | 0.4553***  | 0.4513***  | 0.5264***  | 0.5536*** | 0.4783***  | 0.4209***  | 0.5060*** | 0.4744***  | 0.5255*** | 0.6204*** | 0.4385*** | 0.6780*** | 0.7319*** | 0.7210*** | 0.7624*** | 0.7534*** | 0.2943*** | 0.2744*** |           |           |           |           |           |           |           |           |
| 23                                                                                                                                                                    | 0.5211*** | 0.2946*** | 0.3606***  | 0.3809***  | 0.4738***  | 0.4876*** | 0.3848***  | 0.4517***  | 0.4165*** | 0.3699***  | 0.4590*** | 0.5243*** | 0.3613*** | 0.5577*** | 0.4928*** | 0.4523*** | 0.5566*** | 0.4971*** | 0.3065*** | 0.2952*** | 0.2991*** |           |           |           |           |           |           |           |
| 24                                                                                                                                                                    | 0.5516*** | 0.3312*** | 0.3788***  | 0.4738***  | 0.5259***  | 0.5397*** | 0.4396***  | 0.5058***  | 0.4618*** | 0.4097***  | 0.5027*** | 0.5862*** | 0.4072*** | 0.6091*** | 0.3811*** | 0.4426*** | 0.5064*** | 0.4448*** | 0.3900*** | 0.4057*** | 0.4650*** | 0.1105*** |           |           |           |           |           |           |
| 25                                                                                                                                                                    | 0.2643*** | 0.2052*** | 0.1821***  | 0.2160***  | 0.1868***  | 0.2292*** | 0.1607***  | 0.1751***  | 0.1934*** | 0.1548**   | 0.2327*** | 0.3783*** | 0.1867*** | 0.4200*** | 0.4002*** | 0.4377*** | 0.5364*** | 0.4451*** | 0.2484*** | 0.2791*** | 0.2605*** | 0.3261*** | 0.3779*** |           |           |           |           |           |
| 26                                                                                                                                                                    | 0.7356*** | 0.5517*** | 0.6149***  | 0.5679***  | 0.7027***  | 0.6381*** | 0.6054***  | 0.6375***  | 0.6427*** | 0.6453***  | 0.6210*** | 0.6560*** | 0.6060*** | 0.6890*** | 0.6835*** | 0.6396*** | 0.7352*** | 0.7006*** | 0.5477*** | 0.4594*** | 0.5406*** | 0.3866*** | 0.4692*** | 0.4209*** |           |           |           |           |
| 27                                                                                                                                                                    | 0.7956*** | 0.5140*** | 0.6602***  | 0.6776***  | 0.7773***  | 0.7722*** | 0.6786***  | 0.7244***  | 0.7221*** | 0.7032***  | 0.7048*** | 0.7746*** | 0.6925*** | 0.7973*** | 0.6915*** | 0.5616*** | 0.7256*** | 0.6646*** | 0.4345*** | 0.5200*** | 0.6744*** | 0.2359*** | 0.4108*** | 0.4527*** | 0.4890*** |           |           |           |
| 28                                                                                                                                                                    | 0.6548*** | 0.4425*** | 0.5058***  | 0.5100***  | 0.5961***  | 0.5633*** | 0.5038***  | 0.5315***  | 0.5336*** | 0.5448***  | 0.4667*** | 0.6546*** | 0.5463*** | 0.6863*** | 0.6663*** | 0.5528*** | 0.7187*** | 0.6768*** | 0.3011*** | 0.5182*** | 0.6146*** | 0.3639*** | 0.4739*** | 0.2275*** | 0.5915*** | 0.4494*** |           |           |
| 29                                                                                                                                                                    | 0.4572*** | 0.2619*** | 0.2777***  | 0.3268***  | 0.4165***  | 0.3547--- | 0.3228***  | 0.3376***  | 0.3196*** | 0.3662***  | 0.2997*** | 0.5306*** | 0.3439*** | 0.5896*** | 0.6580*** | 0.5949*** | 0.7426*** | 0.7095*** | 0.2658*** | 0.3729*** | 0.4125*** | 0.3370*** | 0.4543*** | 0.1853*** | 0.5429*** | 0.4966*** | 0.1694--- |           |
| 30                                                                                                                                                                    | 0.5781*** | 0.3939*** | 0.4414***  | 0.3985***  | 0.5031***  | 0.4934*** | 0.4123***  | 0.4725***  | 0.4470*** | 0.4545***  | 0.4752*** | 0.5627*** | 0.4324*** | 0.5961*** | 0.6058*** | 0.5664*** | 0.6755*** | 0.6046*** | 0.3100*** | 0.3787*** | 0.3630*** | 0.2335*** | 0.4110*** | 0.2743*** | 0.4330*** | 0.2141*** | 0.1498**  | 0.2450*** |
